# Supplementary material for: Recruitment challenges in clinical research including cancer patients and caregivers
Source: Springer Nature journal article supplement (doi:10.1186/s13063-015-0948-y), 2015-09-25
Supplement: MOESM1 [file 9782522]

## reftpasienter og pårørend inviteres til å prøve ut et

kan gjennom informasjon og kommunikasjon er berørt av kreft, både pasient og pårørende å mestre utfordringer sykdommen kan gi.

*Både pasient og pårørende ønsker å delta  
Dere har tilgang til internett, og begge har  
(nettbank-brikke) eller BuyPass – for sikker  
Pasient har ikke fått strålebehandling rett*

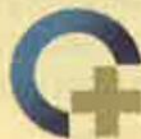

Oslo  
universitetssykehus

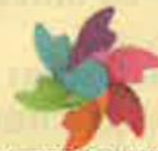

KREFTFORENINGEN

Leaflet announced in the web-site of the Norwegian Cancer Society:



 **Kreftforeningen** delte en lenke.  
for noen sekunder siden

Er du kreftpasient eller pårørende og interessert i å prøve ut et nettbasert støtteverktøy? En pågående studie undersøker nytten av en tjeneste som skal hjelpe å mestre utfordringer knyttet til sykdommen. Hvis du ønsker å delta, se <http://bit.ly/1008LvF> for mer informasjon eller kontakt Senter for pasientmedvirkning (SPS) på tlf 97641106.

**CommuniCare tools - Connect pårørende**  
bit.ly  
NA

The text used in social media (i.e. Face Book):

Internet og Sosiale medier:

Er du kreftpasient eller pårørende og interessert i å prøve ut et nettbasert støtteverktøy? En pågående studie undersøker nytten av en tjeneste som kan hjelpe å mestre utfordringer knyttet til sykdommen. Hvis du ønsker å delta, se <http://www.communicaretools.org/connect/connect-paaroerende.aspx> for mer informasjon eller kontakt Senter for pasientmedvirkning (SPS) på tlf [97641106](tel:97641106).

The form together with brochure available at the rehabilitation center:

## **KREFTPASIENTER OG PÅRØRENDE INVITERES TIL Å PRØVE UT ET NETTBASERT STØTTEVERKTØY (CONNECT)**

Oslo universitetssykehus har utviklet et nettbasert støtteprogram for kreftpasienter og pårørende. Tilgangen til støtteprogrammet inngår i en pågående studie ved Senter for pasientmedvirkning og samhandlingsforskning, og dere inviteres til å delta.

Ønsker du/dere å delta, eller kan vi kontakte dere for mer informasjon?

Ja .....

Nei .....

Hvis dere har svart ja, hvordan kan vi kontakte dere?

Telefonnr.: .....

Navn: .....

Apparatnr: .....

Dette arket kan leveres til kurspersonalet ved Montebello-senteret, og dere blir kontaktet så snart som mulig.

Hilsen

Karin Sygna (kontaktperson)

Tlf: 97641106/epost: [karin.sygna@rr-research.no](mailto:karin.sygna@rr-research.no)

*Senter for pasientmedvirkning og samhandlingsforskning*

*Oslo universitetssykehus*

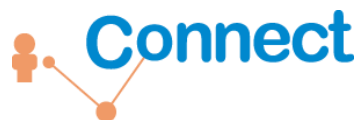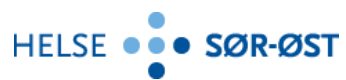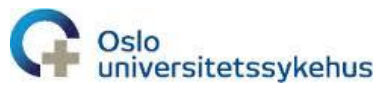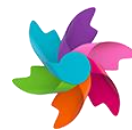

KREFTFORENINGEN

## The brochure:

### Har dere lyst til å benytte dere av støtteverktøyet og delta i studien?

Ta kontakt for å melde dere inn i studien, eller for å få mer uforpliktende informasjon.  
Tel: 97641106 / 22781083

**Safora Johansen** (seniorforsker og daglig leder for prosjektet)  
Epost: sjh@ous-hf.no

**Karin Sygna** (forsker og prosjektmedarbeider)  
Epost: karin.sygna@rr-research.no

**Cornelia Ruland** (professor og prosjektleder)  
Epost: cornelia.ruland@rr-research.no

Alternativt kan dere notere navn og telefonnummer, og levere denne brosjyren til behandlingssted/behandlingspersonell. Vi vil da kontakte dere.

Navn \_\_\_\_\_

Telefon \_\_\_\_\_

For mer informasjon om arbeidet på Senter for Pasientmedvirkning og Samhandlingsforskning (SPS) se [www.communicaretools.org](http://www.communicaretools.org)

 **KREFTFORENINGEN**

 **Connect**

 **Oslo universitetssykehus**  
Senter for pasientmedvirkning og samhandlingsforskning

 **HELSE SØR-ØST**

*"En ekstra støtte i hverdagen"*

## Kreftpasienter og pårørende inviteres til å prøve ut et nettbasert støtteverktøy



**Connect-studien**  
Studien er finansiert av Helse Sør-Øst og Kreftforeningen, og er godkjent av Regional Komité for medisinsk og helsefaglig forskningsetikk

Recruitment for used at the hospital:

## KREFTPASIENTER OG PÅRØRENDE INVITERES TIL Å PRØVE UT ET NETTBASERT STØTTEVERKTØY (CONNECT)

Oslo universitetssykehus har utviklet et nettbasert støtteprogram for kreftpasienter og pårørende. Tilgangen til støtteprogrammet inngår i en pågående studie ved Senter for pasientmedvirkning og samhandlingsforskning, og dere inviteres til å delta.

Ønsker du/dere å delta, eller kan vi kontakte dere for mer informasjon?

Ja .....

Nei .....

Hvis dere har svart ja, hvordan kan vi kontakte dere?

Telefonnr.: .....

Navn: .....

Apparatnr: .....

Dette arket kan leveres til kurspersonalet ved Radiumhospitalet, og dere blir kontaktet så snart som mulig.

Hilsen

Karin Sygna (kontaktperson)

Tlf: 97641106/epost: [karin.sygna@rr-research.no](mailto:karin.sygna@rr-research.no)

*Senter for pasientmedvirkning og samhandlingsforskning*

*Oslo universitetssykehus*



KREFTFORENINGEN



Notes sent to the candidates together with the brochure by the routine care letters:

Nytt tilbud til pasient og pårørende:

**Et nettbasert støtteverktøy som kan være til hjelp i forbindelse med kreftsykdommen.**

### **Noe for deg?**

På Radiumhospitalet tester vi ut et nettbasert støtteverktøy, kalt *Connect*, som kan gi støtte, rådgivning og informasjon knyttet til sykdommen.

Tilgangen til Connect er en del av en pågående studie, der du og din nærmeste pårørende inviteres til å delta. Mer om dette finner du i vedlagt brosjyre.

Vi vil gjerne kontakte deg på telefon om noen dager for å gi mer informasjon om dette tilbudet og for å høre om du og din pårørende ønsker å delta. Hvis du ikke ønsker å bli kontaktet, ber vi om tilbakemelding på telefon 97 64 11 06 (sms/ringe) eller epost til prosjektmedarbeider: [karin.sygna@rr-research.no](mailto:karin.sygna@rr-research.no).
